# Supplementary material for: Comparative morphology and evolution of the cnidosac in Cladobranchia (Gastropoda: Heterobranchia: Nudibranchia)
Source: Front Zool. 2018 Nov 13;15:43. doi: 10.1186/s12983-018-0289-2 (PMC6234619; doi:10.1186/s12983-018-0289-2)
Supplement: Supplementary file 3 — Primers used for fragments of CO1, 16S and 18S. (XLSX 37 kb) [file 12983_2018_289_MOESM3_ESM.xlsx]

## Sheet: Sheet1
Primer	Direction	Sequence 5' à 3'	Reference
CO1 Partial Fragment (length 680 bp)
LCO (1490)	Forward	GGT CAA CAA ATC ATA AAG ATA TTG G	Folmer et al. 1994
HCO (2198)	Reverse	TAA ACT TCA GGG TGA CCA AAA AAT CA	Folmer et al. 1994
C1-N-2329	Forward	ACT GTA AAT ATA TGA TGA GCT CA	Simon et al. (1994)
C1-J-1718	Reverse	GGA GGA TTT GGA AAT TGA TTA GTT CC	Simon et al. (1994)
16S Partial Fragment (length 650)
LR-J-12887 (16S1)	Forward	GGA GCT CCG GTT TGA ACT CAG ATC	Simon et al. 1994
LR-N-13398 (16S2)	Reverse	CGG CCG CCT GTT TAT CAA AAA CAT	Simon et al. 1994
18S Complete (length 1800)
18A1	Forward	CTG GTT GAT CCT GCC AGT CAT ATG C	Spears et al. 1994
400F	Forward	ACG GGT AAC GGG GAA TCA GGG	Spears et al. 1994
700F	Forward	GTC TGG TGC CAG CAG CCG CG	Spears et al. 1994
1155F	Forward	CTG AAA CTT AAA GGA ATT GAC GG	Spears et al. 1994
700R	Reverse	CGC GGC TGC TGG CAC CAG AC	Spears et al. 1994
1155R	Reverse	CCG TCA ATT CCT TTA AGT TTC AG	Spears et al. 1994
1800R	Reverse	GAT CCT TCC GCA GGT TCA CCT ACG	Spears et al. 1994
